# Supplementary material for: InGaN Nanorods Decorated with Au Nanoparticles for Enhanced Water Splitting Based on Surface Plasmon Resonance Effects
Source: PubMed Central journal article supplement (PMC7279278; doi:10.3390/nano10050912), 2020-05-09
Supplement: nanomaterials-10-00912-s001.pdf [file nanomaterials-10-00912-s001.pdf]

Article

# InGaN Nanorods Decorated with Au Nanoparticles for Enhanced Water Splitting Based on Surface Plasmon Resonance Effects

Qing Liu <sup>1</sup>, Jiang Shi <sup>1</sup>, Zhenzhu Xu <sup>2</sup>, Bolin Zhang <sup>1</sup>, Hongliang Liu <sup>1</sup>, Yinlei Lin <sup>3</sup>, Fangliang Gao <sup>1,\*</sup>, Shuti Li <sup>1</sup> and Guoqiang Li <sup>2,\*</sup>

<sup>1</sup> Guangdong Engineering Research Center of Optoelectronic Functional Materials and Devices, Institute of Semiconductors, South China Normal University, Guangzhou 510631, China; 2018022795@m.scnu.edu.cn (Q.L.); 2018022807@m.scnu.edu.cn (J.S.); berlinzhang@foxmail.com (B.Z.); 2019022815@m.scnu.edu.cn (H.L.); lishuti@scnu.edu.cn (S.L.)

<sup>2</sup> State Key Laboratory of Luminescent Materials and Devices, South China University of Technology, Guangzhou 510640, China; zhenzhupearl@163.com

<sup>3</sup> School of Materials Science and Energy Engineering, Foshan University, Foshan 528000, China.; linyinlei@fosu.edu.cn

\* Correspondence: gaofl@m.scnu.edu.cn (F.G.); msgli@scut.edu.cn (G.L.)

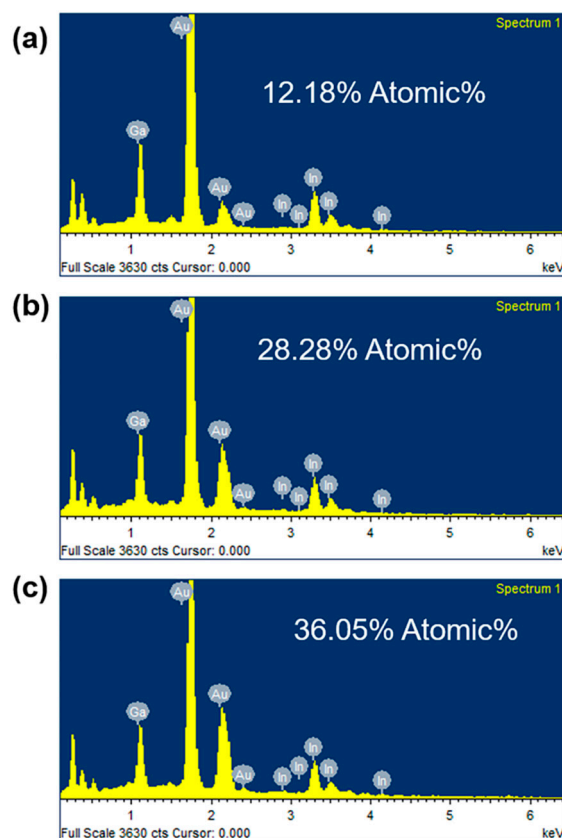

Figure S1. EDS images of Au5@NRs, Au10@NRs, Au15@NRs.
